# Supplementary material for: Extracellular vesicles carry SARS‐CoV‐2 spike protein and serve as decoys for neutralizing antibodies
Source: PubMed Central journal article supplement (PMC8213968; doi:10.1002/jev2.12112), 2021-06-18
Supplement: JEV2-10-e12112-s006.pdf [file JEV2-10-e12112-s006.pdf]

## Supplemental File

### Mass Spectrometry of spike(+) EVs

2.5 mLs of TFF-purified spike(+) EVs were ultracentrifuged at 110,000g for 2 hours using a SW55Ti rotor to pellet EVs. The EV pellet was lysed with 2% SDS mixed with protease inhibitor tablets (Roche Diagnostics). Detergent was removed by the previously published FASP protocol using a 10-kDa cutoff filter (Millipore), and the buffer exchanged for 8 M urea in 50 mM Tris (pH 8) to a final volume of 50  $\mu\text{L}$ <sup>1</sup>. Fifty microliters of 50mM Tris pH 8.5 was added to EV samples prior to digestion to yield a concentration of 2M Urea. The samples were reduced with 10mM dithiothreitol for 1-hour at 37°C, followed by alkylation with 25mM iodoacetamide for 30min in the dark. The digestion was performed with 0.3 micrograms of lysyl endopeptidase on for 1 hour at 37°C followed by the addition of 0.3 micrograms of trypsin and incubation overnight on at 37°C. Sample were analyzed by LC-MS/MS using a Orbitrap Eclipse Tribrid mass spectrometer (Thermo Scientific) equipped with a nanoACQUITY™ Ultra-high pressure liquid chromatography system (Waters). Mobile phases were 0.1% formic acid in water (A) and 0.1% formic acid in acetonitrile (B). Peptides were loaded onto a nanoACQUITY UPLC 2G-V/M C18 desalting trap column (180  $\mu\text{m}$  x 20 mm nano column, 5  $\mu\text{m}$ , 100  $\text{\AA}$ ) at flow rate of 0.300 $\mu\text{l}$ /minute. Subsequently, peptides were resolved in a nanoACQUITY UPLC BEH300 C18 reversed phase column (75 $\mu\text{m}$  x 250 mm nano column, 1.7 $\mu\text{m}$ , 100  $\text{\AA}$ ; Waters) followed by a gradient elution of 1-50 % of Mobile phase B in 120 minutes. A nano ES ion source at a flow rate of 300 nL/min, 1.5 kV spray voltage, and 270°C capillary temperature was

utilized to ionize peptides. Full scan MS spectra (m/z 380-1800) were acquired at a resolution of 60,000 followed by twenty data dependent MS/MS scans. MS/MS spectra were generated by collision-induced dissociation of the peptide ions (normalized collision energy = 35%; activation Q = 0.250; activation time = 20 ms) to generate a series of b- and y-ions as major fragments. The dynamic exclusion list was confined to a maximum of 500 entries with exclusion duration of 60 seconds and mass accuracy of 10 ppm for the precursor monoisotopic mass. LC-MS/MS raw data were acquired using the Xcalibur software (Thermo Fisher Scientific, version 2.2 SP1). The LC-MS/MS raw files were processed and search using Mascot (Matrix Science London, version 2.1) and searched against the Uniprot database that contained both viral and human entries (75,005 sequences; 25,774,322 residues). Mascot search settings were as follow: trypsin enzyme specificity; mass accuracy window for precursor ion, 8 ppm; mass accuracy window for fragment ions, 0.8 Da; carbamidomethylation of cysteines as fixed modifications; oxidation of methionine as variable modification; and one missed cleavage. Searched files were then imported into Scaffold (Proteome Software Inc., version 4.6.2) for peptide validation and quantification by spectral count. Peptide identifications were accepted if there were >95% probability by the Peptide Prophet algorithm. Spectral counts were reported using total spectrum count for each peptide identified.

## References

1. Wiśniewski, J. R., Zougman, A., Nagaraj, N. & Mann, M. Universal sample preparation method for proteome analysis. *Nature Methods* **6**, 359–362 (2009).

| #  | Identified Proteins (500/586)                                                                                                                                           | Accession Number | Spectral Count |
|----|-------------------------------------------------------------------------------------------------------------------------------------------------------------------------|------------------|----------------|
| 1  | Cluster of sp P78527 PRKDC_HUMAN DNA-dependent protein kinase catalytic subunit OS=Homo sapiens OX=9606 GN=PRKDC PE=1 SV=3 (P78527)                                     | P78527 [2]       | 35             |
| 2  | Cluster of sp P07900 HS90A_HUMAN Heat shock protein HSP 90-alpha OS=Homo sapiens OX=9606 GN=HSP90AA1 PE=1 SV=5 (P07900)                                                 | P07900 [7]       | 30             |
| 3  | Cluster of sp Q07954 LRP1_HUMAN Prolow-density lipoprotein receptor-related protein 1 OS=Homo sapiens OX=9606 GN=LRP1 PE=1 SV=2 (Q07954)                                | Q07954 [2]       | 27             |
| 4  | Cluster of sp Q9Y490 TLN1_HUMAN Talin-1 OS=Homo sapiens OX=9606 GN=TLN1 PE=1 SV=3 (Q9Y490)                                                                              | Q9Y490 [3]       | 25             |
| 5  | Cluster of sp Q9BUF5 TBB6_HUMAN Tubulin beta-6 chain OS=Homo sapiens OX=9606 GN=TUBB6 PE=1 SV=1 (Q9BUF5)                                                                | Q9BUF5 [11]      | 25             |
| 6  | Cluster of sp Q14204 DYHC1_HUMAN Cytoplasmic dynein 1 heavy chain 1 OS=Homo sapiens OX=9606 GN=DYNC1H1 PE=1 SV=5 (Q14204)                                               | Q14204 [2]       | 23             |
| 7  | Cluster of tr A0A087VWVQ6 A0A087VWVQ6_HUMAN Clathrin heavy chain OS=Homo sapiens OX=9606 GN=CLTC PE=1 SV=1 (A0A087VWVQ6)                                                | A0A087VWVQ6 [3]  | 21             |
| 8  | Cluster of sp P09874 PARP1_HUMAN Poly [ADP-ribose] polymerase 1 OS=Homo sapiens OX=9606 GN=PARP1 PE=1 SV=4 (P09874)                                                     | P09874 [2]       | 18             |
| 9  | Cluster of tr A0A0G2JIW1 A0A0G2JIW1_HUMAN Heat shock 70 kDa protein 1B OS=Homo sapiens OX=9606 GN=HSPA1B PE=1 SV=1 (A0A0G2JIW1)                                         | A0A0G2JIW1 [4]   | 16             |
| 10 | sp P07996 TSP1_HUMAN Thrombospondin-1 OS=Homo sapiens OX=9606 GN=THBS1 PE=1 SV=2                                                                                        | P07996           | 15             |
| 11 | sp P13639 EEF2_HUMAN Elongation factor 2 OS=Homo sapiens OX=9606 GN=EEF2 PE=1 SV=4                                                                                      | P13639           | 15             |
| 12 | sp P04264 K2C1_HUMAN Keratin, type II cytoskeletal 1 OS=Homo sapiens OX=9606 GN=KRT1 PE=1 SV=6                                                                          | P04264           | 15             |
| 13 | Cluster of sp P13645 K1C10_HUMAN Keratin, type I cytoskeletal 10 OS=Homo sapiens OX=9606 GN=KRT10 PE=1 SV=6 (P13645)                                                    | P13645 [11]      | 14             |
| 14 | sp P02751 FN1C_HUMAN Fibronectin OS=Homo sapiens OX=9606 GN=FN1 PE=1 SV=5                                                                                               | P02751           | 14             |
| 15 | Cluster of sp P68366 TBA4A_HUMAN Tubulin alpha-4A chain OS=Homo sapiens OX=9606 GN=TUBA4A PE=1 SV=1 (P68366)                                                            | P68366 [7]       | 14             |
| 16 | Cluster of sp P50990 TCPQ_HUMAN T-complex protein 1 subunit theta OS=Homo sapiens OX=9606 GN=CCT8 PE=1 SV=4 (P50990)                                                    | P50990 [3]       | 14             |
| 17 | sp P00734 THRB_HUMAN Prothrombin OS=Homo sapiens OX=9606 GN=F2 PE=1 SV=2                                                                                                | P00734           | 13             |
| 18 | Cluster of sp P11142 HSP7C_HUMAN Heat shock cognate 71 kDa protein OS=Homo sapiens OX=9606 GN=HSPA8 PE=1 SV=1 (P11142)                                                  | P11142 [4]       | 13             |
| 19 | tr A0A0U1RQF0 A0A0U1RQF0_HUMAN Fatty acid synthase OS=Homo sapiens OX=9606 GN=FASN PE=1 SV=1                                                                            | A0A0U1RQF0 (+1)  | 12             |
| 20 | sp P07814 SYEP_HUMAN Bifunctional glutamate/proline-tRNA ligase OS=Homo sapiens OX=9606 GN=EPRS1 PE=1 SV=5                                                              | P07814           | 12             |
| 21 | sp Q99832 TCPH_HUMAN T-complex protein 1 subunit eta OS=Homo sapiens OX=9606 GN=CCT7 PE=1 SV=2                                                                          | Q99832           | 12             |
| 22 | sp P55072 TERA_HUMAN Transitional endoplasmic reticulum ATPase OS=Homo sapiens OX=9606 GN=VCP PE=1 SV=4                                                                 | P55072           | 11             |
| 23 | Cluster of sp P31946 1433B_HUMAN 14-3-3 protein beta/alpha OS=Homo sapiens OX=9606 GN=YWHAB PE=1 SV=3 (P31946)                                                          | P31946 [4]       | 11             |
| 24 | sp P11021 BIP_HUMAN Endoplasmic reticulum chaperone BiP OS=Homo sapiens OX=9606 GN=HSPA5 PE=1 SV=2                                                                      | P11021           | 11             |
| 25 | Cluster of sp P21333 FLNA_HUMAN Filamin-A OS=Homo sapiens OX=9606 GN=FLNA PE=1 SV=4 (P21333)                                                                            | P21333 [6]       | 10             |
| 26 | Cluster of sp P14618 PKYM_HUMAN Pyruvate kinase PKM OS=Homo sapiens OX=9606 GN=PKM PE=1 SV=4 (P14618)                                                                   | P14618 [3]       | 10             |
| 27 | sp P19823 ITIH2_HUMAN Inter-alpha-trypsin inhibitor heavy chain H2 OS=Homo sapiens OX=9606 GN=ITIH2 PE=1 SV=2                                                           | P19823 (+1)      | 10             |
| 28 | sp P48643 TCPE_HUMAN T-complex protein 1 subunit epsilon OS=Homo sapiens OX=9606 GN=CCT5 PE=1 SV=1                                                                      | P48643           | 10             |
| 29 | sp Q08211 DHX9_HUMAN ATP-dependent RNA helicase A OS=Homo sapiens OX=9606 GN=DHX9 PE=1 SV=4                                                                             | Q08211           | 10             |
| 30 | sp P23526 SAHH_HUMAN Adenosylhomocysteinase OS=Homo sapiens OX=9606 GN=AHCY PE=1 SV=4                                                                                   | P23526           | 10             |
| 31 | Cluster of sp P68104 EF1A1_HUMAN Elongation factor 1-alpha 1 OS=Homo sapiens OX=9606 GN=EEF1A1 PE=1 SV=1 (P68104)                                                       | P68104 [3]       | 10             |
| 32 | sp P20742 PZP_HUMAN Pregnancy zone protein OS=Homo sapiens OX=9606 GN=PZP PE=1 SV=4                                                                                     | P20742           | 10             |
| 33 | sp P01023 A2MG_HUMAN Alpha-2-macroglobulin OS=Homo sapiens OX=9606 GN=A2M PE=1 SV=3                                                                                     | P01023           | 9              |
| 34 | Cluster of sp P61106 RAB14_HUMAN Ras-related protein Rab-14 OS=Homo sapiens OX=9606 GN=RAB14 PE=1 SV=4 (P61106)                                                         | P61106 [15]      | 9              |
| 35 | sp P01024 CO3_HUMAN Complement C3 OS=Homo sapiens OX=9606 GN=C3 PE=1 SV=2                                                                                               | P01024           | 9              |
| 36 | tr A0A0A0MS51 A0A0A0MS51_HUMAN Gelsolin OS=Homo sapiens OX=9606 GN=GSN PE=1 SV=1                                                                                        | A0A0A0MS51 (+2)  | 9              |
| 37 | Cluster of sp P35527 K1C9_HUMAN Keratin, type I cytoskeletal 9 OS=Homo sapiens OX=9606 GN=KRT9 PE=1 SV=3 (P35527)                                                       | P35527 [2]       | 9              |
| 38 | Cluster of tr G3XAP6 G3XAP6_HUMAN Cartilage oligomeric matrix protein OS=Homo sapiens OX=9606 GN=COMP PE=1 SV=1 (G3XAP6)                                                | G3XAP6 [4]       | 9              |
| 39 | Cluster of sp P17987 TCPA_HUMAN T-complex protein 1 subunit alpha OS=Homo sapiens OX=9606 GN=TCP1 PE=1 SV=1 (P17987)                                                    | P17987 [4]       | 9              |
| 40 | Cluster of sp P35908 K22E_HUMAN Keratin, type II cytoskeletal 2 epidermal OS=Homo sapiens OX=9606 GN=KRT2 PE=1 SV=2 (P35908)                                            | P35908 [3]       | 9              |
| 41 | sp P62593 BLAT_ECOLX Beta-lactamase TEM OS=Escherichia coli OX=562 GN=bla PE=1 SV=1                                                                                     | P62593           | 9              |
| 42 | sp P0DTC2 SPIKE_SARS2 Spike glycoprotein OS=Severe acute respiratory syndrome coronavirus 2 OX=2697049 GN=S PE=1 SV=1                                                   | P0DTC2           | 9              |
| 43 | sp P10809 CH60_HUMAN 60 kDa heat shock protein, mitochondrial OS=Homo sapiens OX=9606 GN=HSPD1 PE=1 SV=2                                                                | P10809           | 9              |
| 44 | Cluster of sp P35579 MYH9_HUMAN Myosin-9 OS=Homo sapiens OX=9606 GN=MYH9 PE=1 SV=4 (P35579)                                                                             | P35579 [5]       | 8              |
| 45 | tr A0A0A0MRJ7 A0A0A0MRJ7_HUMAN Coagulation factor V OS=Homo sapiens OX=9606 GN=F5 PE=1 SV=1                                                                             | A0A0A0MRJ7 (+1)  | 8              |
| 46 | Cluster of sp P49368 TCPG_HUMAN T-complex protein 1 subunit gamma OS=Homo sapiens OX=9606 GN=CCT3 PE=1 SV=4 (P49368)                                                    | P49368 [3]       | 8              |
| 47 | Cluster of tr J3KSZ0 J3KSZ0_HUMAN Eukaryotic initiation factor 4A-1 (Fragment) OS=Homo sapiens OX=9606 GN=EIF4A1 PE=1 SV=1 (J3KSZ0)                                     | J3KSZ0 [4]       | 8              |
| 48 | Cluster of sp P14868 SYDC_HUMAN Aspartate-tRNA ligase, cytoplasmic OS=Homo sapiens OX=9606 GN=DARS1 PE=1 SV=2 (P14868)                                                  | P14868 [2]       | 8              |
| 49 | Cluster of sp Q14974 IMB1_HUMAN Importin subunit beta-1 OS=Homo sapiens OX=9606 GN=KPNB1 PE=1 SV=2 (Q14974)                                                             | Q14974 [3]       | 8              |
| 50 | sp P61247 RS3A_HUMAN 40S ribosomal protein S3a OS=Homo sapiens OX=9606 GN=RPS3A PE=1 SV=2                                                                               | P61247           | 8              |
| 51 | sp Q9Y230 RUVB2_HUMAN RuvB-like 2 OS=Homo sapiens OX=9606 GN=RUVBL2 PE=1 SV=3                                                                                           | Q9Y230           | 8              |
| 52 | sp Q06033 ITIH3_HUMAN Inter-alpha-trypsin inhibitor heavy chain H3 OS=Homo sapiens OX=9606 GN=ITIH3 PE=1 SV=2                                                           | Q06033           | 7              |
| 53 | Cluster of sp P05023 AT1A1_HUMAN Sodium/potassium-transporting ATPase subunit alpha-1 OS=Homo sapiens OX=9606 GN=ATP1A1 PE=1 SV=1 (P05023)                              | P05023 [7]       | 7              |
| 54 | Cluster of sp P53621 COPA_HUMAN Coatomer subunit alpha OS=Homo sapiens OX=9606 GN=COPA PE=1 SV=2 (P53621)                                                               | P53621 [2]       | 7              |
| 55 | sp O75533 SF3B1_HUMAN Splicing factor 3B subunit 1 OS=Homo sapiens OX=9606 GN=SF3B1 PE=1 SV=3                                                                           | O75533           | 7              |
| 56 | sp Q02878 RL6_HUMAN 60S ribosomal protein L6 OS=Homo sapiens OX=9606 GN=RPL6 PE=1 SV=3                                                                                  | Q02878           | 7              |
| 57 | sp P62241 RS8_HUMAN 40S ribosomal protein S8 OS=Homo sapiens OX=9606 GN=RPS8 PE=1 SV=2                                                                                  | P62241 (+1)      | 7              |
| 58 | sp P14625 ENPL_HUMAN Endoplasmic reticulum chaperone BiP OS=Homo sapiens OX=9606 GN=HSP90B1 PE=1 SV=1                                                                   | P14625           | 7              |
| 59 | sp P54289 CA2D1_HUMAN Voltage-dependent calcium channel subunit alpha-2/delta-1 OS=Homo sapiens OX=9606 GN=CACNA2D1 PE=1 SV=3                                           | P54289           | 7              |
| 60 | sp P62805 H4_HUMAN Histone H4 OS=Homo sapiens OX=9606 GN=H4C1 PE=1 SV=2                                                                                                 | P62805           | 7              |
| 61 | Cluster of sp P27824 CALX_HUMAN Calnexin OS=Homo sapiens OX=9606 GN=CANX PE=1 SV=2 (P27824)                                                                             | P27824 [2]       | 7              |
| 62 | Cluster of sp P62258 1433E_HUMAN 14-3-3 protein epsilon OS=Homo sapiens OX=9606 GN=YWHAE PE=1 SV=1 (P62258)                                                             | P62258 [2]       | 7              |
| 63 | Cluster of tr F8VPD4 F8VPD4_HUMAN CAD protein OS=Homo sapiens OX=9606 GN=CAD PE=1 SV=1 (F8VPD4)                                                                         | F8VPD4 [3]       | 6              |
| 64 | sp P04406 G3P_HUMAN Glycerinaldehyde-3-phosphate dehydrogenase OS=Homo sapiens OX=9606 GN=GAPDH PE=1 SV=3                                                               | P04406           | 6              |
| 65 | Cluster of sp Q99460 PSMD1_HUMAN 26S proteasome non-ATPase regulatory subunit 1 OS=Homo sapiens OX=9606 GN=PSMD1 PE=1 SV=2 (Q99460)                                     | Q99460 [3]       | 6              |
| 66 | sp Q9Y5B9 SP16H_HUMAN FACT complex subunit SPT16 OS=Homo sapiens OX=9606 GN=SUPT16H PE=1 SV=1                                                                           | Q9Y5B9           | 6              |
| 67 | Cluster of sp P39023 RL3_HUMAN 60S ribosomal protein L3 OS=Homo sapiens OX=9606 GN=RPL3 PE=1 SV=2 (P39023)                                                              | P39023 [3]       | 6              |
| 68 | Cluster of sp P30153 2AAA_HUMAN Serine/threonine-protein phosphatase 2A 65 kDa regulatory subunit A alpha isoform OS=Homo sapiens OX=9606 GN=PPP2R1A PE=1 SV=4 (P30153) | P30153 [2]       | 6              |
| 69 | sp P40227 TCPZ_HUMAN T-complex protein 1 subunit zeta OS=Homo sapiens OX=9606 GN=CCT6A PE=1 SV=3                                                                        | P40227           | 6              |

|     |                                                                                                                                                         |                 |   |
|-----|---------------------------------------------------------------------------------------------------------------------------------------------------------|-----------------|---|
| 70  | sp P53396 ACLY_HUMAN ATP-citrate synthase OS=Homo sapiens OX=9606 GN=ACLY PE=1 SV=3                                                                     | P53396          | 6 |
| 71  | Cluster of tr A0A0C4DGB6 A0A0C4DGB6_HUMAN Serum albumin OS=Homo sapiens OX=9606 GN=ALB PE=1 SV=1 (A0A0C4DGB6)                                           | A0A0C4DGB6 [4]  | 6 |
| 72  | Cluster of sp P60228 EIF3E_HUMAN Eukaryotic translation initiation factor 3 subunit E OS=Homo sapiens OX=9606 GN=EIF3E PE=1 SV=1 (P60228)               | P60228 [2]      | 6 |
| 73  | Cluster of sp Q76LX8 ATS13_HUMAN A disintegrin and metalloprotease with thrombospondin motifs 13 OS=Homo sapiens OX=9606 GN=ADAMTS13 PE=1 SV=1 (Q76LX8) | Q76LX8 [2]      | 6 |
| 74  | Cluster of tr A0A2C9F2M7 A0A2C9F2M7_HUMAN D-3-phosphoglycerate dehydrogenase OS=Homo sapiens OX=9606 GN=PHGDH PE=1 SV=1 (A0A2C9F2M7)                    | A0A2C9F2M7 [5]  | 6 |
| 75  | sp P19827 ITIH1_HUMAN Inter-alpha-trypsin inhibitor heavy chain H1 OS=Homo sapiens OX=9606 GN=ITIH1 PE=1 SV=3                                           | P19827          | 6 |
| 76  | sp P22314 UBA1_HUMAN Ubiquitin-like modifier-activating enzyme 1 OS=Homo sapiens OX=9606 GN=UBA1 PE=1 SV=3                                              | P22314          | 6 |
| 77  | tr A8MUD9 A8MUD9_HUMAN 60S ribosomal protein L7 OS=Homo sapiens OX=9606 GN=RPL7 PE=1 SV=1                                                               | A8MUD9 (+1)     | 6 |
| 78  | Cluster of tr R4GNH3 R4GNH3_HUMAN 26S proteasome regulatory subunit 6A OS=Homo sapiens OX=9606 GN=PSMC3 PE=1 SV=1 (R4GNH3)                              | R4GNH3 [2]      | 6 |
| 79  | Cluster of tr E9PCY7 E9PCY7_HUMAN Heterogeneous nuclear ribonucleoprotein H OS=Homo sapiens OX=9606 GN=HNRNPH1 PE=1 SV=1 (E9PCY7)                       | E9PCY7 [5]      | 6 |
| 80  | Cluster of sp P19338 NUCL_HUMAN Nucleolin OS=Homo sapiens OX=9606 GN=NCL PE=1 SV=3 (P19338)                                                             | P19338 [2]      | 6 |
| 81  | Cluster of sp Q9Y265 RUVB1_HUMAN RuvB-like 1 OS=Homo sapiens OX=9606 GN=RUVBL1 PE=1 SV=1 (Q9Y265)                                                       | Q9Y265 [2]      | 6 |
| 82  | sp P26373 RPL13_HUMAN 60S ribosomal protein L13 OS=Homo sapiens OX=9606 GN=RPL13 PE=1 SV=4                                                              | P26373          | 6 |
| 83  | Cluster of sp P69905 HBA_HUMAN Hemoglobin subunit alpha OS=Homo sapiens OX=9606 GN=HBA1 PE=1 SV=2 (P69905)                                              | P69905 [2]      | 5 |
| 84  | Cluster of tr A0A087X0X3 A0A087X0X3_HUMAN Heterogeneous nuclear ribonucleoprotein M OS=Homo sapiens OX=9606 GN=HNRNPM PE=1 SV=1 (A0A087X0X3)            | A0A087X0X3 [4]  | 5 |
| 85  | sp P78371 TCPB_HUMAN T-complex protein 1 subunit beta OS=Homo sapiens OX=9606 GN=CCT2 PE=1 SV=4                                                         | P78371          | 5 |
| 86  | tr I3L1L3 I3L1L3_HUMAN Myb-binding protein 1A (Fragment) OS=Homo sapiens OX=9606 GN=MYBBP1A PE=1 SV=1                                                   | I3L1L3 (+1)     | 5 |
| 87  | tr A0A0A0MSX9 A0A0A0MSX9_HUMAN Isoleucine--tRNA ligase, cytoplasmic OS=Homo sapiens OX=9606 GN=IARS1 PE=1 SV=1                                          | A0A0A0MSX9 (+1) | 5 |
| 88  | sp Q12860 CNTN1_HUMAN Contactin-1 OS=Homo sapiens OX=9606 GN=CNTN1 PE=1 SV=1                                                                            | Q12860          | 5 |
| 89  | sp P36578 RPL4_HUMAN 60S ribosomal protein L4 OS=Homo sapiens OX=9606 GN=RPL4 PE=1 SV=5                                                                 | P36578          | 5 |
| 90  | Cluster of sp P00558 PGK1_HUMAN Phosphoglycerate kinase 1 OS=Homo sapiens OX=9606 GN=PGK1 PE=1 SV=3 (P00558)                                            | P00558 [2]      | 5 |
| 91  | Cluster of tr A0A5F9ZHM4 A0A5F9ZHM4_HUMAN L-lactate dehydrogenase OS=Homo sapiens OX=9606 GN=LDHB PE=1 SV=1 (A0A5F9ZHM4)                                | A0A5F9ZHM4 [9]  | 5 |
| 92  | Cluster of sp Q00839 HNRPU_HUMAN Heterogeneous nuclear ribonucleoprotein U OS=Homo sapiens OX=9606 GN=HNRNPU PE=1 SV=6 (Q00839)                         | Q00839 [2]      | 5 |
| 93  | Cluster of sp P62701 RS4X_HUMAN 40S ribosomal protein S4, X isoform OS=Homo sapiens OX=9606 GN=RPS4X PE=1 SV=2 (P62701)                                 | P62701 [1]      | 5 |
| 94  | sp P06737 PYGL_HUMAN Glycogen phosphorylase, liver form OS=Homo sapiens OX=9606 GN=PYGL PE=1 SV=4                                                       | P06737          | 5 |
| 95  | Cluster of sp P50395 GDI2_HUMAN Rab GDP dissociation inhibitor beta OS=Homo sapiens OX=9606 GN=GDI2 PE=1 SV=2 (P50395)                                  | P50395 [2]      | 5 |
| 96  | Cluster of sp Q15393 SF3B3_HUMAN Splicing factor 3B subunit 3 OS=Homo sapiens OX=9606 GN=SF3B3 PE=1 SV=4 (Q15393)                                       | Q15393 [2]      | 5 |
| 97  | sp P25786 PSA1_HUMAN Proteasome subunit alpha type-1 OS=Homo sapiens OX=9606 GN=PSMA1 PE=1 SV=1                                                         | P25786          | 5 |
| 98  | sp P26641 EEF1G_HUMAN Elongation factor 1-gamma OS=Homo sapiens OX=9606 GN=EEF1G PE=1 SV=3                                                              | P26641          | 5 |
| 99  | sp P62269 RS18_HUMAN 40S ribosomal protein S18 OS=Homo sapiens OX=9606 GN=RPS18 PE=1 SV=3                                                               | P62269          | 5 |
| 100 | sp P07737 PROF1_HUMAN Profilin-1 OS=Homo sapiens OX=9606 GN=PFN1 PE=1 SV=2                                                                              | P07737          | 5 |
| 101 | Cluster of sp P62244 RS15A_HUMAN 40S ribosomal protein S15a OS=Homo sapiens OX=9606 GN=RPS15A PE=1 SV=2 (P62244)                                        | P62244 [2]      | 5 |
| 102 | Cluster of sp P84085 ARF5_HUMAN ADP-ribosylation factor 5 OS=Homo sapiens OX=9606 GN=ARF5 PE=1 SV=2 (P84085)                                            | P84085 [4]      | 5 |
| 103 | tr C9JNW5 C9JNW5_HUMAN 60S ribosomal protein L24 OS=Homo sapiens OX=9606 GN=RPL24 PE=1 SV=1                                                             | C9JNW5 (+2)     | 5 |
| 104 | Cluster of sp P12111 COL6A3_HUMAN Collagen alpha-3(VI) chain OS=Homo sapiens OX=9606 GN=COL6A3 PE=1 SV=5 (P12111)                                       | P12111 [2]      | 5 |
| 105 | sp Q9UBG0 MRC2_HUMAN C-type mannose receptor 2 OS=Homo sapiens OX=9606 GN=MRC2 PE=1 SV=2                                                                | Q9UBG0          | 4 |
| 106 | Cluster of sp P04114 APOB_HUMAN Apolipoprotein B-100 OS=Homo sapiens OX=9606 GN=APOB PE=1 SV=2 (P04114)                                                 | P04114 [2]      | 4 |
| 107 | Cluster of sp Q5T4S7 UBR4_HUMAN E3 ubiquitin-protein ligase UBR4 OS=Homo sapiens OX=9606 GN=UBR4 PE=1 SV=1 (Q5T4S7)                                     | Q5T4S7 [2]      | 4 |
| 108 | Cluster of sp Q6P2Q9 PRP8_HUMAN Pre-mRNA-processing-splicing factor 8 OS=Homo sapiens OX=9606 GN=PRPF8 PE=1 SV=2 (Q6P2Q9)                               | Q6P2Q9 [2]      | 4 |
| 109 | sp Q13200 PSMD2_HUMAN 26S proteasome non-ATPase regulatory subunit 2 OS=Homo sapiens OX=9606 GN=PSMD2 PE=1 SV=3                                         | Q13200          | 4 |
| 110 | sp O75643 U520_HUMAN U5 small nuclear ribonucleoprotein 200 kDa helicase OS=Homo sapiens OX=9606 GN=SNRNP200 PE=1 SV=2                                  | O75643          | 4 |
| 111 | sp P13010 XRCC5_HUMAN X-ray repair cross-complementing protein 5 OS=Homo sapiens OX=9606 GN=XRCC5 PE=1 SV=3                                             | P13010          | 4 |
| 112 | tr F5GZS6 F5GZS6_HUMAN 4F2 cell-surface antigen heavy chain OS=Homo sapiens OX=9606 GN=SLC3A2 PE=1 SV=1                                                 | F5GZS6 (+2)     | 4 |
| 113 | sp P50991 TCPD_HUMAN T-complex protein 1 subunit delta OS=Homo sapiens OX=9606 GN=CCT4 PE=1 SV=4                                                        | P50991          | 4 |
| 114 | Cluster of tr A0A0U1RR32 A0A0U1RR32_HUMAN Histone H2A OS=Homo sapiens OX=9606 GN=hCG_2039566 PE=3 SV=1 (A0A0U1RR32)                                     | A0A0U1RR32 [14] | 4 |
| 115 | sp P12956 XRCC6_HUMAN X-ray repair cross-complementing protein 6 OS=Homo sapiens OX=9606 GN=XRCC6 PE=1 SV=2                                             | P12956          | 4 |
| 116 | Cluster of sp P23142 FBLN1_HUMAN Fibulin-1 OS=Homo sapiens OX=9606 GN=FBLN1 PE=1 SV=4 (P23142)                                                          | P23142 [2]      | 4 |
| 117 | Cluster of sp Q9UBF2 COPG2_HUMAN Coatomer subunit gamma-2 OS=Homo sapiens OX=9606 GN=COPG2 PE=1 SV=1 (Q9UBF2)                                           | Q9UBF2 [2]      | 4 |
| 118 | tr X6RJP6 X6RJP6_HUMAN Transgelin-2 (Fragment) OS=Homo sapiens OX=9606 GN=TAGLN2 PE=1 SV=1                                                              | X6RJP6          | 4 |
| 119 | Cluster of tr H0YJM8 H0YJM8_HUMAN Proteasome subunit beta type-5 (Fragment) OS=Homo sapiens OX=9606 GN=PSMB5 PE=1 SV=1 (H0YJM8)                         | H0YJM8 [2]      | 4 |
| 120 | Cluster of sp O14818 PSA7_HUMAN Proteasome subunit alpha type-7 OS=Homo sapiens OX=9606 GN=PSMA7 PE=1 SV=1 (O14818)                                     | O14818 [2]      | 4 |
| 121 | sp O43242 PSMD3_HUMAN 26S proteasome non-ATPase regulatory subunit 3 OS=Homo sapiens OX=9606 GN=PSMD3 PE=1 SV=2                                         | O43242          | 4 |
| 122 | sp P35606 COPB2_HUMAN Coatomer subunit beta' OS=Homo sapiens OX=9606 GN=COPB2 PE=1 SV=2                                                                 | P35606          | 4 |
| 123 | Cluster of tr A0A494C165 A0A494C165_HUMAN Xaa-Pro dipeptidase (Fragment) OS=Homo sapiens OX=9606 GN=PEPD PE=1 SV=1 (A0A494C165)                         | A0A494C165 [2]  | 4 |
| 124 | tr E7EPB3 E7EPB3_HUMAN 60S ribosomal protein L14 OS=Homo sapiens OX=9606 GN=RPL14 PE=1 SV=1                                                             | E7EPB3          | 4 |
| 125 | Cluster of tr F8VU65 F8VU65_HUMAN 60S acidic ribosomal protein P0 (Fragment) OS=Homo sapiens OX=9606 GN=RPLP0 PE=1 SV=1 (F8VU65)                        | F8VU65 [5]      | 4 |
| 126 | sp P11047 LAMC1_HUMAN Laminin subunit gamma-1 OS=Homo sapiens OX=9606 GN=LAMC1 PE=1 SV=3                                                                | P11047          | 4 |
| 127 | sp P25788 PSA3_HUMAN Proteasome subunit alpha type-3 OS=Homo sapiens OX=9606 GN=PSMA3 PE=1 SV=2                                                         | P25788          | 4 |
| 128 | Cluster of sp P25789 PSA4_HUMAN Proteasome subunit alpha type-4 OS=Homo sapiens OX=9606 GN=PSMA4 PE=1 SV=1 (P25789)                                     | P25789 [2]      | 4 |
| 129 | sp P04746 AMYP_HUMAN Pancreatic alpha-amylase OS=Homo sapiens OX=9606 GN=AMY2A PE=1 SV=2                                                                | P04746          | 4 |
| 130 | sp Q7L2H7 EIF3M_HUMAN Eukaryotic translation initiation factor 3 subunit M OS=Homo sapiens OX=9606 GN=EIF3M PE=1 SV=1                                   | Q7L2H7          | 4 |
| 131 | tr A0A024RA52 A0A024RA52_HUMAN Proteasome subunit alpha type OS=Homo sapiens OX=9606 GN=PSMA2 PE=1 SV=1                                                 | A0A024RA52 (+1) | 4 |
| 132 | tr A0A087X211 A0A087X211_HUMAN 26S proteasome regulatory subunit 10B OS=Homo sapiens OX=9606 GN=PSMC6 PE=1 SV=1                                         | A0A087X211 (+1) | 4 |
| 133 | tr A0A499F148 A0A499F148_HUMAN Protein integral disulfide-isomerase OS=Homo sapiens OX=9606 GN=PDIA4 PE=1 SV=1                                          | A0A499F148      | 4 |
| 134 | sp Q12907 LMAN2_HUMAN Vesicular integral-membrane protein VIP36 OS=Homo sapiens OX=9606 GN=LMAN2 PE=1 SV=1                                              | Q12907          | 4 |
| 135 | tr E5R199 E5R199_HUMAN 60S ribosomal protein L30 (Fragment) OS=Homo sapiens OX=9606 GN=RPL30 PE=1 SV=1                                                  | E5R199 (+1)     | 4 |
| 136 | sp P01031 CO5_HUMAN Complement C5 OS=Homo sapiens OX=9606 GN=C5 PE=1 SV=4                                                                               | P01031          | 4 |
| 137 | sp P35998 PRST7_HUMAN 26S proteasome regulatory subunit 7 OS=Homo sapiens OX=9606 GN=PSMC2 PE=1 SV=3                                                    | P35998          | 4 |
| 138 | Cluster of sp P61353 RL27_HUMAN 60S ribosomal protein L27 OS=Homo sapiens OX=9606 GN=RPL27 PE=1 SV=2 (P61353)                                           | P61353 [2]      | 4 |
| 139 | sp Q9Y3U8 RL36_HUMAN 60S ribosomal protein L36 OS=Homo sapiens OX=9606 GN=RPL36 PE=1 SV=3                                                               | Q9Y3U8          | 4 |
| 140 | sp P62195 PRS8_HUMAN 26S proteasome regulatory subunit 8 OS=Homo sapiens OX=9606 GN=PSMC5 PE=1 SV=1                                                     | P62195          | 4 |

|     |                                                                                                                                                  |                 |   |
|-----|--------------------------------------------------------------------------------------------------------------------------------------------------|-----------------|---|
| 141 | sp P06732 KCRM_HUMAN Creatine kinase M-type OS=Homo sapiens OX=9606 GN=CKM PE=1 SV=2                                                             | P06732          | 4 |
| 142 | sp P18085 ARF4_HUMAN ADP-ribosylation factor 4 OS=Homo sapiens OX=9606 GN=ARF4 PE=1 SV=3                                                         | P18085          | 4 |
| 143 | sp Q9P2J5 SYLC_HUMAN Leucine--tRNA ligase, cytoplasmic OS=Homo sapiens OX=9606 GN=LARS1 PE=1 SV=2                                                | Q9P2J5          | 4 |
| 144 | sp P62424 RL7A_HUMAN 60S ribosomal protein L7a OS=Homo sapiens OX=9606 GN=RPL7A PE=1 SV=2                                                        | P62424          | 4 |
| 145 | sp Q13347 EIF3I_HUMAN Eukaryotic translation initiation factor 3 subunit I OS=Homo sapiens OX=9606 GN=EIF3I PE=1 SV=1                            | Q13347          | 4 |
| 146 | sp P30101 PDIA3_HUMAN Protein disulfide-isomerase A3 OS=Homo sapiens OX=9606 GN=PDIA3 PE=1 SV=4                                                  | P30101          | 4 |
| 147 | sp Q8NI27 THOC2_HUMAN THO complex subunit 2 OS=Homo sapiens OX=9606 GN=THOC2 PE=1 SV=2                                                           | Q8NI27          | 4 |
| 148 | sp Q14152 EIF3A_HUMAN Eukaryotic translation initiation factor 3 subunit A OS=Homo sapiens OX=9606 GN=EIF3A PE=1 SV=1                            | Q14152          | 3 |
| 149 | sp B5ME19 EIF3L_HUMAN Eukaryotic translation initiation factor 3 subunit C-like protein OS=Homo sapiens OX=9606 GN=EIF3CL PE=1 SV=1              | B5ME19 (+1)     | 3 |
| 150 | sp Q9NR30 DDX21_HUMAN Nucleolar RNA helicase 2 OS=Homo sapiens OX=9606 GN=DDX21 PE=1 SV=5                                                        | Q9NR30          | 3 |
| 151 | Cluster of tr A0A0G2JPR0 A0A0G2JPR0_HUMAN Complement C4-A OS=Homo sapiens OX=9606 GN=C4A PE=1 SV=1 (A0A0G2JPR0)                                  | A0A0G2JPR0 [6]  | 3 |
| 152 | Cluster of tr G3XAI2 G3XAI2_HUMAN Laminin subunit beta-1 OS=Homo sapiens OX=9606 GN=LAMB1 PE=1 SV=1 (G3XAI2)                                     | G3XAI2 [3]      | 3 |
| 153 | sp P55884 EIF3B_HUMAN Eukaryotic translation initiation factor 3 subunit B OS=Homo sapiens OX=9606 GN=EIF3B PE=1 SV=3                            | P55884          | 3 |
| 154 | Cluster of sp Q15008 PSMD6_HUMAN 26S proteasome non-ATPase regulatory subunit 6 OS=Homo sapiens OX=9606 GN=PSMD6 PE=1 SV=1 (Q15008)              | Q15008 [2]      | 3 |
| 155 | Cluster of tr A0A0A0MSQ0 A0A0A0MSQ0_HUMAN Plastin-3 OS=Homo sapiens OX=9606 GN=PLS3 PE=1 SV=1 (A0A0A0MSQ0)                                       | A0A0A0MSQ0 [3]  | 3 |
| 156 | tr A0A087X0S5 A0A087X0S5_HUMAN Collagen alpha-1(VI) chain OS=Homo sapiens OX=9606 GN=COL6A1 PE=1 SV=1                                            | A0A087X0S5 (+1) | 3 |
| 157 | tr A0A0C4DGH5 A0A0C4DGH5_HUMAN Cullin-associated NEDD8-dissociated protein 1 (Fragment) OS=Homo sapiens OX=9606 GN=CAND1 PE=1 SV=1               | A0A0C4DGH5 (+1) | 3 |
| 158 | Cluster of tr G3V2Q1 G3V2Q1_HUMAN Heterogeneous nuclear ribonucleoproteins C1/C2 OS=Homo sapiens OX=9606 GN=HNRNPC PE=1 SV=1 (G3V2Q1)            | G3V2Q1 [4]      | 3 |
| 159 | Cluster of sp Q06830 PRDX1_HUMAN Peroxiredoxin-1 OS=Homo sapiens OX=9606 GN=PRDX1 PE=1 SV=1 (Q06830)                                             | Q06830 [2]      | 3 |
| 160 | Cluster of sp Q08945 SSRP1_HUMAN FACT complex subunit SSRP1 OS=Homo sapiens OX=9606 GN=SSRP1 PE=1 SV=1 (Q08945)                                  | Q08945 [2]      | 3 |
| 161 | Cluster of tr K7EPF6 K7EPF6_HUMAN 6-phosphogluconate dehydrogenase, decarboxylating (Fragment) OS=Homo sapiens OX=9606 GN=PGD PE=1 SV=1 (K7EPF6) | K7EPF6 [2]      | 3 |
| 162 | sp P46776 RL27A_HUMAN 60S ribosomal protein L27a OS=Homo sapiens OX=9606 GN=RPL27A PE=1 SV=2                                                     | P46776          | 3 |
| 163 | Cluster of sp Q13263 TIF1B_HUMAN Transcription intermediary factor 1-beta OS=Homo sapiens OX=9606 GN=TRIM28 PE=1 SV=5 (Q13263)                   | Q13263 [2]      | 3 |
| 164 | tr H0YHA7 H0YHA7_HUMAN 60S ribosomal protein L18 (Fragment) OS=Homo sapiens OX=9606 GN=RPL18 PE=1 SV=1                                           | H0YHA7          | 3 |
| 165 | sp P61313 RL15_HUMAN 60S ribosomal protein L15 OS=Homo sapiens OX=9606 GN=RPL15 PE=1 SV=2                                                        | P61313          | 3 |
| 166 | tr G3V295 G3V295_HUMAN Proteasome subunit alpha type OS=Homo sapiens OX=9606 GN=PSMA6 PE=1 SV=1                                                  | G3V295 (+2)     | 3 |
| 167 | sp Q00232 PSD12_HUMAN 26S proteasome non-ATPase regulatory subunit 12 OS=Homo sapiens OX=9606 GN=PSMD12 PE=1 SV=3                                | Q00232          | 3 |
| 168 | Cluster of sp P05387 RLA2_HUMAN 60S acidic ribosomal protein P2 OS=Homo sapiens OX=9606 GN=RPLP2 PE=1 SV=1 (P05387)                              | P05387 [2]      | 3 |
| 169 | sp P54136 SYRC_HUMAN Arginine--tRNA ligase, cytoplasmic OS=Homo sapiens OX=9606 GN=RARS1 PE=1 SV=2                                               | P54136          | 3 |
| 170 | tr A0A0B4J1R4 A0A0B4J1R4_HUMAN 4-hydroxyphenylpyruvate dioxygenase OS=Homo sapiens OX=9606 GN=HPD PE=1 SV=1                                      | A0A0B4J1R4 (+1) | 3 |
| 171 | Cluster of sp P36955 PEDF_HUMAN Pigment epithelium-derived factor OS=Homo sapiens OX=9606 GN=SERPINF1 PE=1 SV=4 (P36955)                         | P36955 [2]      | 3 |
| 172 | sp P49721 PSB2_HUMAN Proteasome subunit beta type-2 OS=Homo sapiens OX=9606 GN=PSMB2 PE=1 SV=1                                                   | P49721          | 3 |
| 173 | sp P56192 SYMC_HUMAN Methionine--tRNA ligase, cytoplasmic OS=Homo sapiens OX=9606 GN=MARS1 PE=1 SV=2                                             | P56192          | 3 |
| 174 | sp Q9UHB9 SRP68_HUMAN Signal recognition particle subunit SRP68 OS=Homo sapiens OX=9606 GN=SRP68 PE=1 SV=2                                       | Q9UHB9          | 3 |
| 175 | tr MOR0F0 MOR0F0_HUMAN 40S ribosomal protein S5 (Fragment) OS=Homo sapiens OX=9606 GN=RPS5 PE=1 SV=1                                             | MOR0F0 (+2)     | 3 |
| 176 | sp P28066 PSA5_HUMAN Proteasome subunit alpha type-5 OS=Homo sapiens OX=9606 GN=PSMA5 PE=1 SV=3                                                  | P28066          | 3 |
| 177 | sp P62081 RS7_HUMAN 40S ribosomal protein S7 OS=Homo sapiens OX=9606 GN=RPS7 PE=1 SV=1                                                           | P62081          | 3 |
| 178 | sp P28072 PSB6_HUMAN Proteasome subunit beta type-6 OS=Homo sapiens OX=9606 GN=PSMB6 PE=1 SV=4                                                   | P28072          | 3 |
| 179 | sp P00747 PLMN_HUMAN Plasminogen OS=Homo sapiens OX=9606 GN=PLG PE=1 SV=2                                                                        | P00747          | 3 |
| 180 | tr J3KMX3 J3KMX3_HUMAN Alpha-fetoprotein OS=Homo sapiens OX=9606 GN=AFP PE=1 SV=1                                                                | J3KMX3 (+1)     | 3 |
| 181 | sp O60701 UGDH_HUMAN UDP-glucose 6-dehydrogenase OS=Homo sapiens OX=9606 GN=UGDH PE=1 SV=1                                                       | O60701          | 3 |
| 182 | Cluster of tr E9PC52 E9PC52_HUMAN Histone-binding protein RBBP7 OS=Homo sapiens OX=9606 GN=RBBP7 PE=1 SV=1 (E9PC52)                              | E9PC52 [4]      | 3 |
| 183 | sp P02649 APOE_HUMAN Apolipoprotein E OS=Homo sapiens OX=9606 GN=APOE PE=1 SV=1                                                                  | P02649          | 3 |
| 184 | Cluster of sp P15880 RS2_HUMAN 40S ribosomal protein S2 OS=Homo sapiens OX=9606 GN=RPS2 PE=1 SV=2 (P15880)                                       | P15880 [3]      | 3 |
| 185 | sp P49720 PSB3_HUMAN Proteasome subunit beta type-3 OS=Homo sapiens OX=9606 GN=PSMB3 PE=1 SV=2                                                   | P49720          | 3 |
| 186 | sp P02765 FETUA_HUMAN Alpha-2-HS-glycoprotein OS=Homo sapiens OX=9606 GN=AHSG PE=1 SV=2                                                          | P02765          | 3 |
| 187 | sp P46781 RS9_HUMAN 40S ribosomal protein S9 OS=Homo sapiens OX=9606 GN=RPS9 PE=1 SV=3                                                           | P46781          | 3 |
| 188 | sp O00410 IPO5_HUMAN Importin-5 OS=Homo sapiens OX=9606 GN=IPO5 PE=1 SV=4                                                                        | O00410          | 3 |
| 189 | sp P08670 VIME_HUMAN Vimentin OS=Homo sapiens OX=9606 GN=VIM PE=1 SV=4                                                                           | P08670          | 3 |
| 190 | Cluster of tr G3XAK1 G3XAK1_HUMAN Hepatocyte growth factor-like protein OS=Homo sapiens OX=9606 GN=MST1 PE=1 SV=1 (G3XAK1)                       | G3XAK1 [4]      | 3 |
| 191 | tr E9PK25 E9PK25_HUMAN Cofilin-1 OS=Homo sapiens OX=9606 GN=CFL1 PE=1 SV=1                                                                       | E9PK25 (+3)     | 3 |
| 192 | tr H0Y4R1 H0Y4R1_HUMAN Inosine-5'-monophosphate dehydrogenase 2 (Fragment) OS=Homo sapiens OX=9606 GN=IMPDH2 PE=1 SV=1                           | H0Y4R1          | 3 |
| 193 | sp Q9NRN5 OLFL3_HUMAN Olfactomedin-like protein 3 OS=Homo sapiens OX=9606 GN=OLFML3 PE=2 SV=1                                                    | Q9NRN5          | 3 |
| 194 | sp P01008 ANT3_HUMAN Antithrombin-III OS=Homo sapiens OX=9606 GN=SERPINC1 PE=1 SV=1                                                              | P01008          | 3 |
| 195 | tr A0A2R8Y6G6 A0A2R8Y6G6_HUMAN Alpha-enolase OS=Homo sapiens OX=9606 GN=ENO1 PE=1 SV=1                                                           | A0A2R8Y6G6 (+1) | 3 |
| 196 | tr H3BNC9 H3BNC9_HUMAN Uncharacterized protein OS=Homo sapiens OX=9606 GN=PE=3 SV=2                                                              | H3BNC9          | 3 |
| 197 | tr A6NMH8 A6NMH8_HUMAN Tetraspanin OS=Homo sapiens OX=9606 GN=CD81 PE=1 SV=1                                                                     | A6NMH8          | 3 |
| 198 | sp P01266 THYG_HUMAN Thyroglobulin OS=Homo sapiens OX=9606 GN=TG PE=1 SV=5                                                                       | P01266          | 3 |
| 199 | tr E7EX29 E7EX29_HUMAN 14-3-3 protein zeta/delta (Fragment) OS=Homo sapiens OX=9606 GN=YWHAZ PE=1 SV=1                                           | E7EX29 (+1)     | 3 |
| 200 | sp P62753 RS6_HUMAN 40S ribosomal protein S6 OS=Homo sapiens OX=9606 GN=RPS6 PE=1 SV=1                                                           | P62753          | 3 |
| 201 | sp P04004 VTNC_HUMAN Vitronectin OS=Homo sapiens OX=9606 GN=VTN PE=1 SV=1                                                                        | P04004          | 3 |
| 202 | Cluster of sp P15121 ALDR_HUMAN Aldo-keto reductase family 1 member B1 OS=Homo sapiens OX=9606 GN=AKR1B1 PE=1 SV=3 (P15121)                      | P15121 [2]      | 3 |
| 203 | Cluster of tr B5MDF5 B5MDF5_HUMAN GTP-binding nuclear protein Ran OS=Homo sapiens OX=9606 GN=RAN PE=1 SV=1 (B5MDF5)                              | B5MDF5 [2]      | 3 |
| 204 | sp P22234 PUR6_HUMAN Multifunctional protein ADE2 OS=Homo sapiens OX=9606 GN=PAICS PE=1 SV=3                                                     | P22234          | 3 |
| 205 | sp P12277 KCRB_HUMAN Creatine kinase B-type OS=Homo sapiens OX=9606 GN=CKB PE=1 SV=1                                                             | P12277          | 3 |
| 206 | tr A0A0G2JLD8 A0A0G2JLD8_HUMAN Single-stranded DNA-binding protein, mitochondrial (Fragment) OS=Homo sapiens OX=9606 GN=SSBP1 PE=1 SV=1          | A0A0G2JLD8 (+3) | 3 |
| 207 | sp P31939 PUR9_HUMAN Bifunctional purine biosynthesis protein ATIC OS=Homo sapiens OX=9606 GN=ATIC PE=1 SV=3                                     | P31939          | 3 |
| 208 | sp O75891 AL1L1_HUMAN Cytosolic 10-formyltetrahydrofolate dehydrogenase OS=Homo sapiens OX=9606 GN=ALDH1L1 PE=1 SV=2                             | O75891          | 3 |
| 209 | tr H0YKD8 H0YKD8_HUMAN 60S ribosomal protein L28 OS=Homo sapiens OX=9606 GN=RPL28 PE=1 SV=1                                                      | H0YKD8          | 3 |
| 210 | tr A0A1W2PQ51 A0A1W2PQ51_HUMAN Probable ATP-dependent RNA helicase DDX17 OS=Homo sapiens OX=9606 GN=DDX17 PE=1 SV=1                              | A0A1W2PQ51 (+1) | 3 |
| 211 | tr E7EUU4 E7EUU4_HUMAN Eukaryotic translation initiation factor 4 gamma 1 OS=Homo sapiens OX=9606 GN=EIF4G1 PE=1 SV=1                            | E7EUU4 (+3)     | 3 |

|     |                                                                                                                                                                  |                  |   |
|-----|------------------------------------------------------------------------------------------------------------------------------------------------------------------|------------------|---|
| 212 | sp Q13308 PTK7_HUMAN Inactive tyrosine-protein kinase 7 OS=Homo sapiens OX=9606 GN=PTK7 PE=1 SV=2                                                                | Q13308           | 3 |
| 213 | sp Q13332 PTPRS_HUMAN Receptor-type tyrosine-protein phosphatase S OS=Homo sapiens OX=9606 GN=PTPRS PE=1 SV=3                                                    | Q13332           | 3 |
| 214 | tr A0A3B3IS80 A0A3B3IS80_HUMAN Fructose-bisphosphate aldolase OS=Homo sapiens OX=9606 GN=ALDOB PE=1 SV=1                                                         | A0A3B3IS80 (+1)  | 3 |
| 215 | sp Q9Y4W2 LAS1L_HUMAN Ribosomal biogenesis protein LAS1L OS=Homo sapiens OX=9606 GN=LAS1L PE=1 SV=2                                                              | Q9Y4W2           | 3 |
| 216 | sp O60763 USO1_HUMAN General vesicular transport factor p115 OS=Homo sapiens OX=9606 GN=USO1 PE=1 SV=2                                                           | O60763           | 3 |
| 217 | Cluster of sp P17858 PFKAL_HUMAN ATP-dependent 6-phosphofructokinase, liver type OS=Homo sapiens OX=9606 GN=PFKL PE=1 SV=6 (P17858)                              | P17858 [3]       | 2 |
| 218 | sp P04275 VWF_HUMAN von Willebrand factor OS=Homo sapiens OX=9606 GN=VWF PE=1 SV=4                                                                               | P04275           | 2 |
| 219 | sp P62249 RS16_HUMAN 40S ribosomal protein S16 OS=Homo sapiens OX=9606 GN=RPS16 PE=1 SV=2                                                                        | P62249           | 2 |
| 220 | Cluster of tr C9JFV4 C9JFV4_HUMAN Proline-, glutamic acid- and leucine-rich protein 1 OS=Homo sapiens OX=9606 GN=PELP1 PE=1 SV=2 (C9JFV4)                        | C9JFV4 [3]       | 2 |
| 221 | Cluster of sp Q15063 POSTN_HUMAN Periostin OS=Homo sapiens OX=9606 GN=POSTN PE=1 SV=2 (Q15063)                                                                   | Q15063 [2]       | 2 |
| 222 | Cluster of sp O14744 ANM5_HUMAN Protein arginine N-methyltransferase 5 OS=Homo sapiens OX=9606 GN=PRMT5 PE=1 SV=4 (O14744)                                       | O14744 [2]       | 2 |
| 223 | tr A0A087X054 A0A087X054_HUMAN Hypoxia up-regulated protein 1 OS=Homo sapiens OX=9606 GN=HYOU1 PE=1 SV=1                                                         | A0A087X054 (+2)  | 2 |
| 224 | Cluster of tr H9KV75 H9KV75_HUMAN Alpha-actinin-1 OS=Homo sapiens OX=9606 GN=ACTN1 PE=1 SV=1 (H9KV75)                                                            | H9KV75 [4]       | 2 |
| 225 | Cluster of sp P23396 RS3_HUMAN 40S ribosomal protein S3 OS=Homo sapiens OX=9606 GN=RPS3 PE=1 SV=2 (P23396)                                                       | P23396 [2]       | 2 |
| 226 | Cluster of sp O60506 HNRPQ_HUMAN Heterogeneous nuclear ribonucleoprotein Q OS=Homo sapiens OX=9606 GN=SYNCRIP PE=1 SV=2 (O60506)                                 | O60506 [2]       | 2 |
| 227 | sp P11717 MPRL_HUMAN Cation-independent mannose-6-phosphate receptor OS=Homo sapiens OX=9606 GN=IGF2R PE=1 SV=3                                                  | P11717           | 2 |
| 228 | sp Q01518 CAP1_HUMAN Adenylyl cyclase-associated protein 1 OS=Homo sapiens OX=9606 GN=CAP1 PE=1 SV=5                                                             | Q01518           | 2 |
| 229 | sp O14980 XPO1_HUMAN Exportin-1 OS=Homo sapiens OX=9606 GN=XPO1 PE=1 SV=1                                                                                        | O14980           | 2 |
| 230 | Cluster of sp P61978 HNRPK_HUMAN Heterogeneous nuclear ribonucleoprotein K OS=Homo sapiens OX=9606 GN=HNRNPK PE=1 SV=1 (P61978)                                  | P61978 [2]       | 2 |
| 231 | Cluster of tr A0A2R8Y7R2 A0A2R8Y7R2_HUMAN Hemoglobin subunit beta OS=Homo sapiens OX=9606 GN=HBB PE=1 SV=1 (A0A2R8Y7R2)                                          | A0A2R8Y7R2 [3]   | 2 |
| 232 | Cluster of sp P62987 RL40_HUMAN Ubiquitin-60S ribosomal protein L40 OS=Homo sapiens OX=9606 GN=UBA52 PE=1 SV=2 (P62987)                                          | P62987 [3]       | 2 |
| 233 | sp P02675 FIBB_HUMAN Fibrinogen beta chain OS=Homo sapiens OX=9606 GN=FGB PE=1 SV=2                                                                              | P02675           | 2 |
| 234 | sp P62937 PPIA_HUMAN Peptidyl-prolyl cis-trans isomerase A OS=Homo sapiens OX=9606 GN=PPIA PE=1 SV=2                                                             | P62937           | 2 |
| 235 | Cluster of H7C2U8-DECOY                                                                                                                                          | H7C2U8-DECOY [2] | 2 |
| 236 | sp P00488 F13A_HUMAN Coagulation factor XIII A chain OS=Homo sapiens OX=9606 GN=F13A1 PE=1 SV=4                                                                  | P00488           | 2 |
| 237 | tr A0A2R8Y6J3 A0A2R8Y6J3_HUMAN 60S ribosomal protein L5 (Fragment) OS=Homo sapiens OX=9606 GN=RPL5 PE=1 SV=1                                                     | A0A2R8Y6J3 (+1)  | 2 |
| 238 | sp Q43143 DXH15_HUMAN Pre-mRNA-splicing factor ATP-dependent RNA helicase DXH15 OS=Homo sapiens OX=9606 GN=DXH15 PE=1 SV=2                                       | Q43143           | 2 |
| 239 | sp Q86UX7 URP2_HUMAN Fermitin family homolog 3 OS=Homo sapiens OX=9606 GN=FERMT3 PE=1 SV=1                                                                       | Q86UX7           | 2 |
| 240 | sp Q00231 PSD11_HUMAN 26S proteasome non-ATPase regulatory subunit 11 OS=Homo sapiens OX=9606 GN=PSMD11 PE=1 SV=3                                                | Q00231           | 2 |
| 241 | sp O15232 MATN3_HUMAN Matrilin-3 OS=Homo sapiens OX=9606 GN=MATN3 PE=1 SV=2                                                                                      | O15232           | 2 |
| 242 | Cluster of tr A0A087WTE4 A0A087WTE4_HUMAN Neural cell adhesion molecule 1 OS=Homo sapiens OX=9606 GN=NCAM1 PE=1 SV=1 (A0A087WTE4)                                | A0A087WTE4 [5]   | 2 |
| 243 | tr R4GMR5 R4GMR5_HUMAN 26S proteasome non-ATPase regulatory subunit 8 OS=Homo sapiens OX=9606 GN=PSMD8 PE=1 SV=1                                                 | R4GMR5           | 2 |
| 244 | sp Q06828 FMOD_HUMAN Fibromodulin OS=Homo sapiens OX=9606 GN=FMOD PE=1 SV=2                                                                                      | Q06828           | 2 |
| 245 | sp P20618 PSB1_HUMAN Proteasome subunit beta type-1 OS=Homo sapiens OX=9606 GN=PSMB1 PE=1 SV=2                                                                   | P20618           | 2 |
| 246 | sp P43686 PRSB6B_HUMAN 26S proteasome regulatory subunit 6B OS=Homo sapiens OX=9606 GN=PSMC4 PE=1 SV=2                                                           | P43686           | 2 |
| 247 | sp P05543 THBG_HUMAN Thyroxine-binding globulin OS=Homo sapiens OX=9606 GN=SERPINA7 PE=1 SV=2                                                                    | P05543           | 2 |
| 248 | tr D6RAR4 D6RAR4_HUMAN Hepatocyte growth factor activator OS=Homo sapiens OX=9606 GN=HGFC PE=1 SV=1                                                              | D6RAR4 (+1)      | 2 |
| 249 | sp Q9NXF1 TEX10_HUMAN Testis-expressed protein 10 OS=Homo sapiens OX=9606 GN=TEX10 PE=1 SV=2                                                                     | Q9NXF1           | 2 |
| 250 | tr A0A0C4DG17 A0A0C4DG17_HUMAN 40S ribosomal protein SA OS=Homo sapiens OX=9606 GN=RPSA PE=1 SV=1                                                                | A0A0C4DG17 (+2)  | 2 |
| 251 | sp P53618 COPB_HUMAN Coatomer subunit beta OS=Homo sapiens OX=9606 GN=COPB1 PE=1 SV=3                                                                            | P53618           | 2 |
| 252 | sp P54577 SYYC_HUMAN Tyrosine--tRNA ligase, cytoplasmic OS=Homo sapiens OX=9606 GN=YARS1 PE=1 SV=4                                                               | P54577           | 2 |
| 253 | sp P32969 RL9_HUMAN 60S ribosomal protein L9 OS=Homo sapiens OX=9606 GN=RPL9 PE=1 SV=1                                                                           | P32969           | 2 |
| 254 | tr E9PEP6 E9PEP6_HUMAN Neuropilin OS=Homo sapiens OX=9606 GN=NRP1 PE=1 SV=2                                                                                      | E9PEP6 (+1)      | 2 |
| 255 | sp Q8NC51 PAIRB_HUMAN Plasminogen activator inhibitor 1 RNA-binding protein OS=Homo sapiens OX=9606 GN=SERBP1 PE=1 SV=2                                          | Q8NC51           | 2 |
| 256 | tr A0A3B3ITZ9 A0A3B3ITZ9_HUMAN Thyroid hormone receptor-associated protein 3 OS=Homo sapiens OX=9606 GN=THRAP3 PE=1 SV=1                                         | A0A3B3ITZ9 (+1)  | 2 |
| 257 | tr F5GX39 F5GX39_HUMAN Transmembrane emp24 domain-containing protein 2 OS=Homo sapiens OX=9606 GN=TMED2 PE=1 SV=1                                                | F5GX39 (+1)      | 2 |
| 258 | tr C9JC84 C9JC84_HUMAN Fibrinogen gamma chain OS=Homo sapiens OX=9606 GN=FGG PE=1 SV=1                                                                           | C9JC84 (+1)      | 2 |
| 259 | sp P51665 PSMD7_HUMAN 26S proteasome non-ATPase regulatory subunit 7 OS=Homo sapiens OX=9606 GN=PSMD7 PE=1 SV=2                                                  | P51665           | 2 |
| 260 | sp P51570 GALK1_HUMAN Galactokinase OS=Homo sapiens OX=9606 GN=GALK1 PE=1 SV=1                                                                                   | P51570           | 2 |
| 261 | sp P00352 AL1A1_HUMAN Retinal dehydrogenase 1 OS=Homo sapiens OX=9606 GN=ALDH1A1 PE=1 SV=2                                                                       | P00352           | 2 |
| 262 | sp P37837 TALDO_HUMAN Transaldolase OS=Homo sapiens OX=9606 GN=TALDO1 PE=1 SV=2                                                                                  | P37837           | 2 |
| 263 | sp P63241 EIF5A1_HUMAN Eukaryotic translation initiation factor 5A-1 OS=Homo sapiens OX=9606 GN=EIF5A PE=1 SV=2                                                  | P63241           | 2 |
| 264 | Cluster of tr C9JIS1 C9JIS1_HUMAN Guanine nucleotide-binding protein G(I)/G(S)/G(T) subunit beta-2 (Fragment) OS=Homo sapiens OX=9606 GN=GNB2 PE=1 SV=1 (C9JIS1) | C9JIS1 [4]       | 2 |
| 265 | tr E9PRY8 E9PRY8_HUMAN Elongation factor 1-delta OS=Homo sapiens OX=9606 GN=EEF1D PE=1 SV=1                                                                      | E9PRY8           | 2 |
| 266 | sp Q15493 RGN_HUMAN Regucalcin OS=Homo sapiens OX=9606 GN=RGN PE=1 SV=1                                                                                          | Q15493           | 2 |
| 267 | sp O43505 B4GA1_HUMAN Beta-1,4-glucuronyltransferase 1 OS=Homo sapiens OX=9606 GN=B4GAT1 PE=1 SV=1                                                               | O43505           | 2 |
| 268 | tr I3L3U9 I3L3U9_HUMAN Ribosomal L1 domain-containing protein 1 (Fragment) OS=Homo sapiens OX=9606 GN=RSL1D1 PE=1 SV=1                                           | I3L3U9 (+1)      | 2 |
| 269 | sp P60174 TPIS_HUMAN Triosephosphate isomerase OS=Homo sapiens OX=9606 GN=TP11 PE=1 SV=3                                                                         | P60174           | 2 |
| 270 | tr I3L3H2 I3L3H2_HUMAN Eukaryotic initiation factor 4A-III OS=Homo sapiens OX=9606 GN=EIF4A3 PE=1 SV=2                                                           | I3L3H2 (+1)      | 2 |
| 271 | sp P00742 FA10_HUMAN Coagulation factor X OS=Homo sapiens OX=9606 GN=F10 PE=1 SV=2                                                                               | P00742           | 2 |
| 272 | tr A0A0B4J2B4 A0A0B4J2B4_HUMAN 40S ribosomal protein S15 OS=Homo sapiens OX=9606 GN=RPS15 PE=1 SV=1                                                              | A0A0B4J2B4 (+5)  | 2 |
| 273 | tr C9JW96 C9JW96_HUMAN Prohibitin (Fragment) OS=Homo sapiens OX=9606 GN=PHB PE=1 SV=2                                                                            | C9JW96 (+4)      | 2 |
| 274 | sp O75396 SEC22B_HUMAN Vesicle-trafficking protein SEC22b OS=Homo sapiens OX=9606 GN=SEC22B PE=1 SV=4                                                            | O75396           | 2 |
| 275 | tr D3YTG3 D3YTG3_HUMAN Target of Nesh-SH3 OS=Homo sapiens OX=9606 GN=ABI3BP PE=1 SV=1                                                                            | D3YTG3 (+2)      | 2 |
| 276 | sp P04180 LCAT_HUMAN Phosphatidylcholine-sterol acyltransferase OS=Homo sapiens OX=9606 GN=LCAT PE=1 SV=1                                                        | P04180           | 2 |
| 277 | sp Q00266 METK1_HUMAN S-adenosylmethionine synthase isoform type-1 OS=Homo sapiens OX=9606 GN=MAT1A PE=1 SV=2                                                    | Q00266           | 2 |
| 278 | sp O75131 CPNE3_HUMAN Copine-3 OS=Homo sapiens OX=9606 GN=CPNE3 PE=1 SV=1                                                                                        | O75131           | 2 |
| 279 | sp P62316 SMD2_HUMAN Small nuclear ribonucleoprotein Sm D2 OS=Homo sapiens OX=9606 GN=SNRPD2 PE=1 SV=1                                                           | P62316           | 2 |
| 280 | sp P62851 RS25_HUMAN 40S ribosomal protein S25 OS=Homo sapiens OX=9606 GN=RPS25 PE=1 SV=1                                                                        | P62851           | 2 |
| 281 | tr E9PKZ0 E9PKZ0_HUMAN 60S ribosomal protein L8 (Fragment) OS=Homo sapiens OX=9606 GN=RPL8 PE=1 SV=1                                                             | E9PKZ0 (+1)      | 2 |
| 282 | Cluster of sp P05556 ITB1_HUMAN Integrin beta-1 OS=Homo sapiens OX=9606 GN=ITGB1 PE=1 SV=2 (P05556)                                                              | P05556 [2]       | 2 |

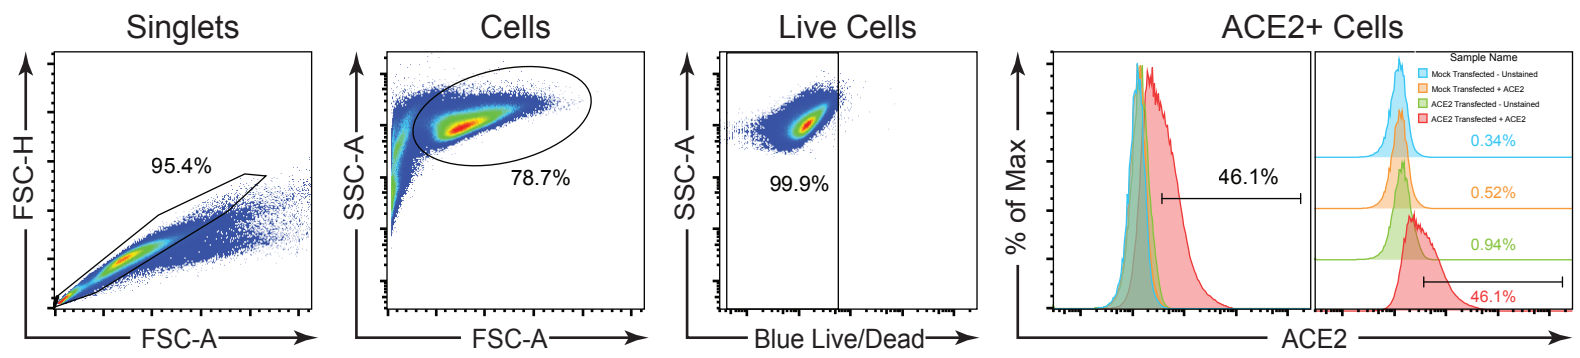

### Supplemental Figure 1: Analysis of ACE2 expression in HEK293Ts

Flow cytometry plots showing gating strategy for analysis of ACE2 expression in transiently transfected HEK293Ts. Doublet events were excluded using a FSC-H x FSC-A singlets gate (left plot). Small debris and cell fragments were excluded using a FSC x SSC size gate (middle-left panel) and live cells gated due to their ability to prevent uptake of a LIVE/DEAD marker (middle-right panel). HEK293T cells expressing ACE2 were readily detected by flow cytometry (right panel). ACE2 staining was not detected in mock-transfected HEK293T cells, or when no anti-ACE2 antibody was added.

**A**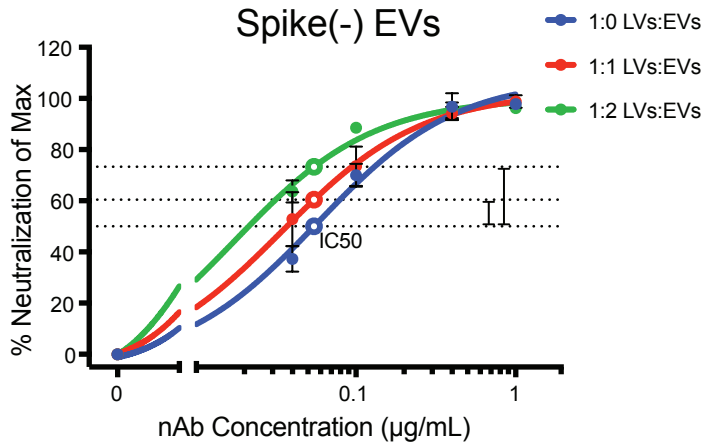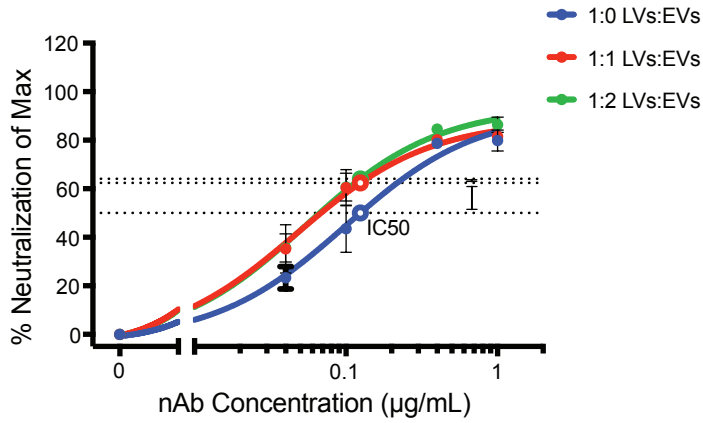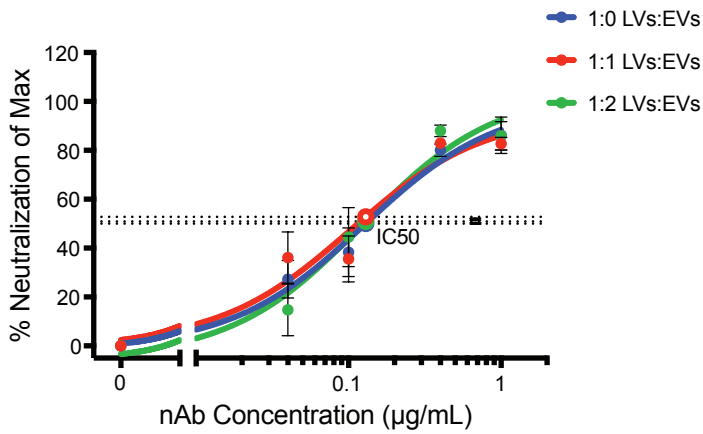**B**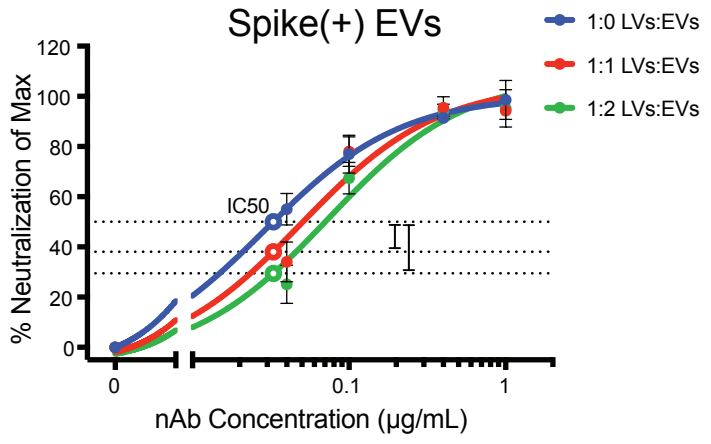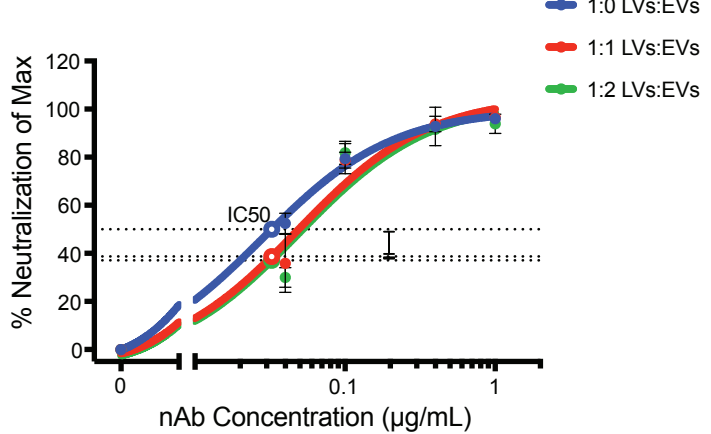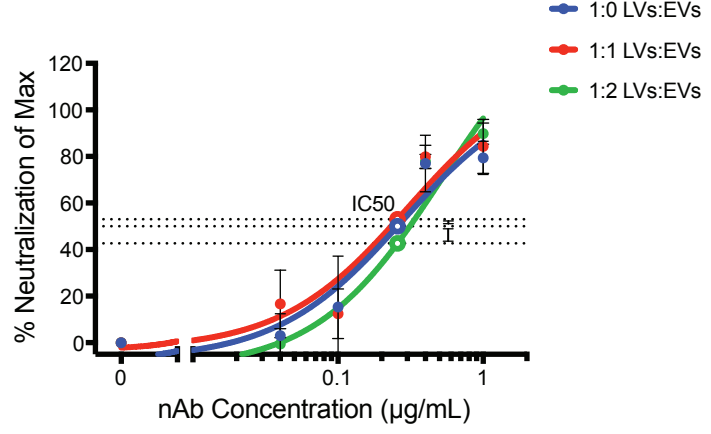

**Supplemental Figure 2: Spike(+) EVs reduce the efficiency of commercial neutralizing antibodies at blocking SARS-CoV-2 spike-dependent viral entry – all biological replicates**

Dose curves of nAb-mediated inhibition of S-LV entry in the presence of spike(-) EVs (**A**) and spike(+) EVs (**B**) at varying ratios. Each condition was repeated twice to make three independent biological replicates, stacked into columns. Data on each graph are displayed as mean  $\pm$  SD of technical triplicates. The open point on the blue line (1:0 LVs:EVs) represents the interpolated IC<sub>50</sub> value. The open points on the red and green lines represent the interpolated % neutralization value at the IC<sub>50</sub> concentration determined from the blue line. Dashed lines are a visual representation of the changes in neutralization efficiency induced by spike(-) or (+) EVs.



A

### Anti-spike Antibodies

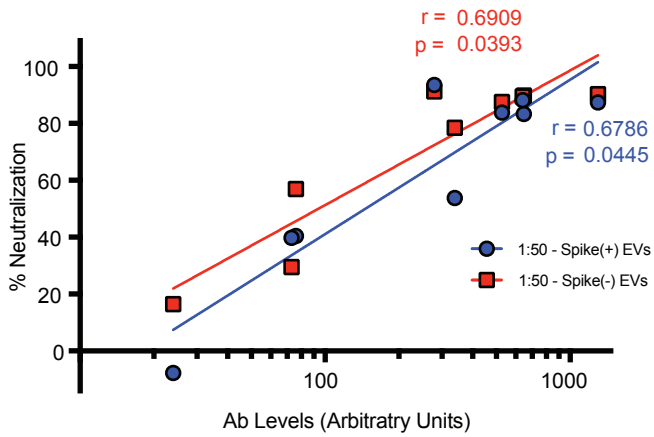

B

### Anti-spike RBD Antibodies

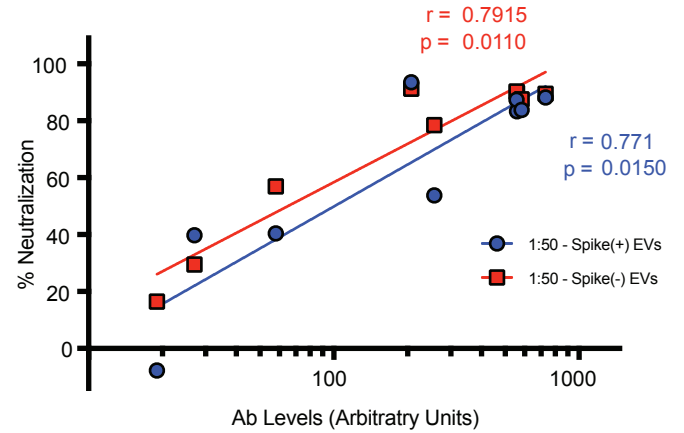

### Supplemental Figure 3: Correlations of serum S-LV neutralization values and serum anti-spike antibody levels

Scatter plots representing the relationship between serum neutralization values at a 50-fold dilution and serum anti-spike (A) and anti-spike RBD (B) antibody titers. The Y-axis represents % neutralization values (100 – normalized % of max infection, as detailed in methods). The X-axis represents anti-spike antibody titers, quantified by arbitrary units. The red symbols represent neutralization in the spike(-) EV condition, while the blue symbols represent the spike(+) EV condition. Pearson correlation was performed in order to determine the relationship between the two variables. A linear regression line was overlaid for each condition in order to represent this correlation. ‘r’ represents the Pearson correlation coefficient, with a corresponding p-value.

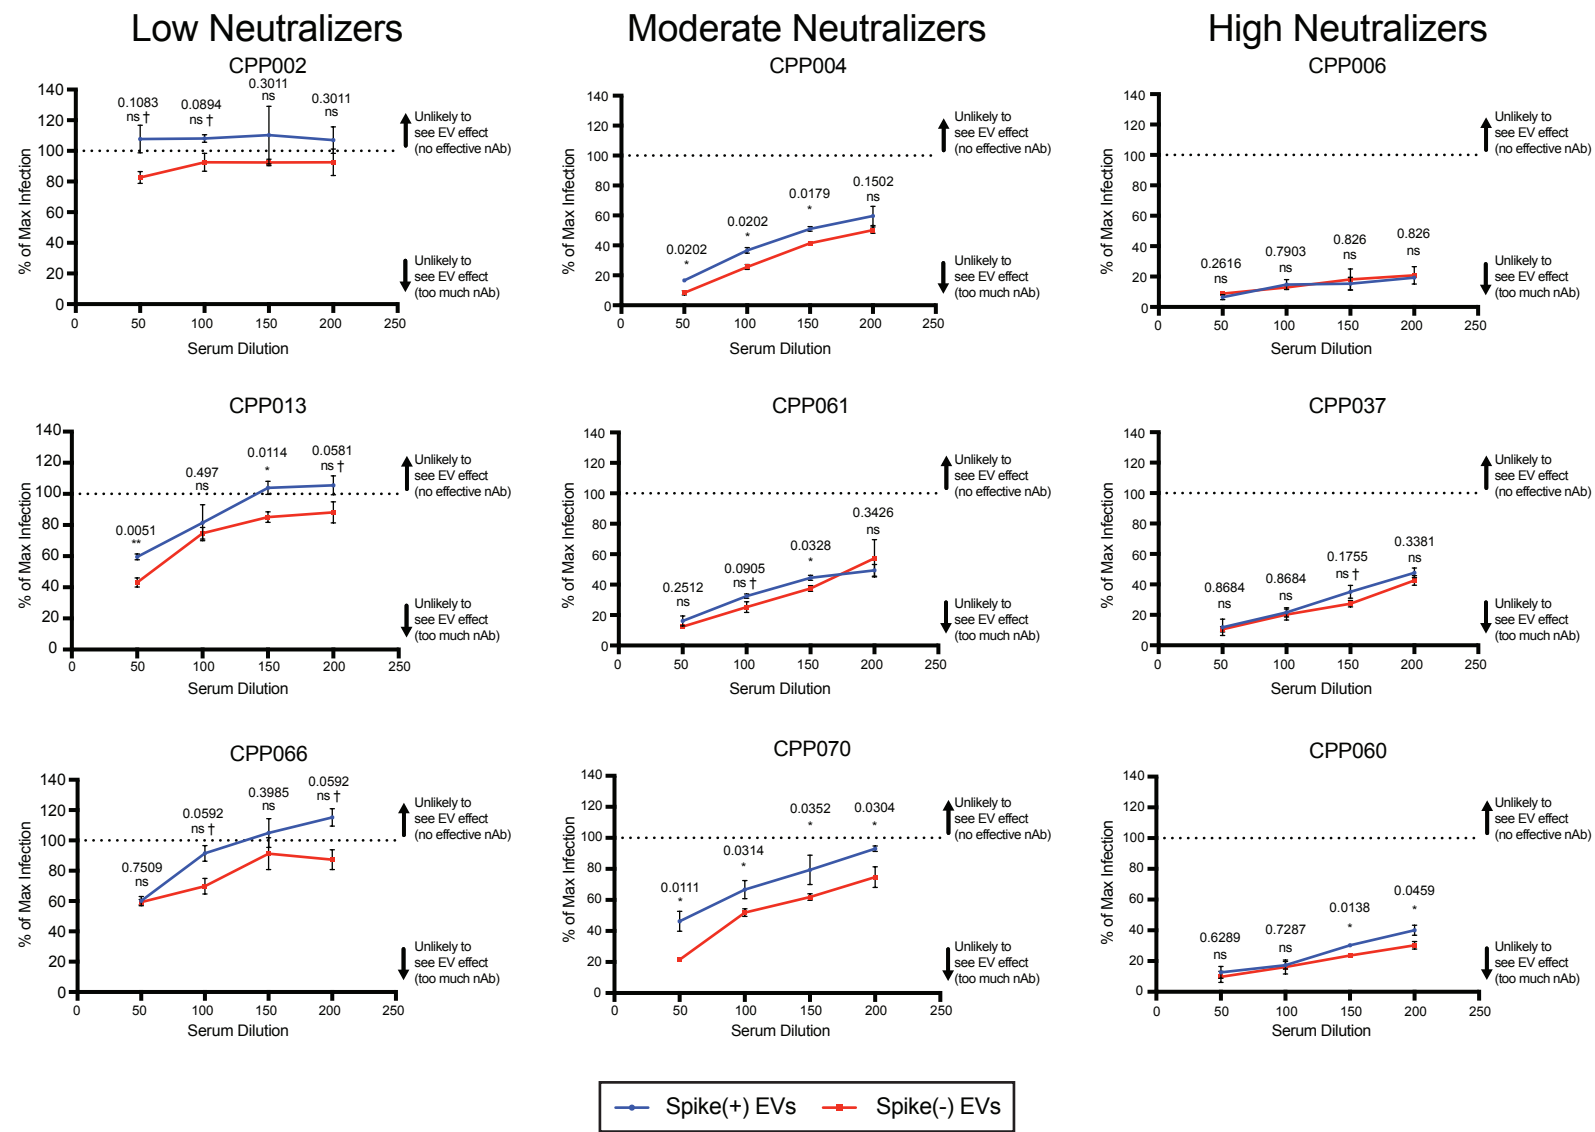

### Supplemental Figure 4: Spike(+) EVs reduce the neutralizing ability of convalescent COVID-19 patient sera – all patients

COVID-19 convalescent serum S-LV neutralization curves from 9 different patients representing low, moderate, and high neutralization ability, stacked into corresponding columns. Curves represent serum neutralization in the presence of spike(-) EVs (red) and spike(+) EVs (blue). The Y-axis represents S-LV infection levels normalized to a no serum/no EVs infection control (termed max infection) a calculation described in the methods. The X-axis represents fold-dilution of the patient serum. Data are displayed as mean  $\pm$  SD of technical triplicates. For patients CPP002, CPP004, and CPP066, the spike(-) EVs data are displayed as mean  $\pm$  SD of technical duplicates. Significance was measured by multiple T-tests followed by Holm-Sidak correction for multiple comparisons. Asterisks over the columns represent the p-values of the T-tests after correction for multiple comparisons. ns, not significant; ns $\dagger$ , significant prior to correction for multiple comparisons; \*,  $p \leq 0.05$ ; \*\*,  $p \leq 0.01$ .
